# Supplementary material for: Fronto-limbic disconnection in patients with multiple sclerosis and depression
Source: PubMed Central journal article supplement — Mult Scler. 2018 Mar 28;25(5):715–26. doi: 10.1177/1352458518767051 (PMC6439942; doi:10.1177/1352458518767051), 2018-03-28
Supplement: MSJ767051_supplementary_tables.pdf [file MSJ767051_supplementary_tables.pdf]

## Supplementary Tables

**Supplementary Table 1. Performance on neuropsychological tests of depressed and non-depressed patients with MS and healthy controls**

|                                         | DMS ( <i>n</i> =22)       | nDMS ( <i>n</i> =21) | HCs ( <i>n</i> =12) | DMS vs. nDMS        |          | DMS vs. HCs          |          | nDMS vs. HCs         |          |
|-----------------------------------------|---------------------------|----------------------|---------------------|---------------------|----------|----------------------|----------|----------------------|----------|
|                                         |                           |                      |                     | Difference [CI]     | <i>P</i> | Difference [CI]      | <i>P</i> | Difference [CI]      | <i>P</i> |
| Verbal memory                           | -1.98 (1.67) <sup>a</sup> | -1.68 (2.11)         | 0.00 (1.00)         | -0.57 [-1.53; 0.40] | 0.24     | -2.16 [-3.33; -1.00] | < 0.001  | -1.60 [-2.72; -0.47] | < 0.01   |
| Information processing speed            | -0.66 (0.81)              | -0.46 (0.81)         | 0.00 (1.00)         | -0.37 [-0.85; 0.12] | 0.14     | -0.86 [-1.46; -0.27] | 0.01     | -0.50 [-1.07; 0.08]  | 0.09     |
| Visuospatial memory                     | -0.23 (2.01)              | -0.94 (3.03)         | 0.00 (1.00)         | 0.30 [-1.05; 1.65]  | 0.66     | -0.69 [-2.33; 0.95]  | 0.40     | -0.99 [-2.58; 0.60]  | 0.22     |
| Short-term memory<br>Digit span forward | -0.42 (0.90)              | -0.65 (1.04)         | 0.00 (1.00)         | 0.21 [-0.41; 0.83]  | 0.49     | -0.51 [-1.26; 0.24]  | 0.18     | -0.72 [-1.45; 0.01]  | 0.05     |
| Working memory<br>Digit span backward   | -0.76 (1.28)              | -0.80 (1.35)         | 0.00 (1.00)         | 0.03 [-0.77; 0.83]  | 0.95     | -0.81 [-1.78; 0.16]  | 0.10     | -0.84 [-1.78; 0.10]  | 0.08     |
| Letter-number sequencing                | -0.94 (1.16)              | -0.73 (1.25)         | 0.00 (1.00)         | -0.17 [-0.91; 0.57] | 0.65     | -0.92 [-1.82; -0.02] | 0.05     | -0.75 [-1.63; 0.12]  | 0.09     |
| Verbal fluency<br>animals               | -0.01 (0.73) <sup>a</sup> | 0.06 (1.01)          | 0.00 (1.00)         | -0.02 [-0.60; 0.56] | 0.95     | 0.11 [-0.59; 0.81]   | 0.74     | 0.13 [-0.54; 0.81]   | 0.70     |
| professions                             | -0.32 (0.99) <sup>a</sup> | 0.25 (1.04)          | 0.00 (1.00)         | -0.41 [-1.02; 0.20] | 0.19     | -0.02 [-0.76; 0.72]  | 0.96     | 0.39 [-0.33; 1.11]   | 0.28     |
| m-words                                 | -0.32 (0.77) <sup>a</sup> | -0.18 (0.81)         | 0.00 (1.00)         | -0.22 [-0.71; 0.27] | 0.37     | -0.35 [-0.94; 0.25]  | 0.24     | -0.13 [-0.70; 0.45]  | 0.66     |

Displayed data are mean *Z*-score (standard deviation).

<sup>a</sup> *n* = 21

CI = confidence interval; DMS = depressed multiple sclerosis patients; HCs = healthy controls; nDMS = non-depressed multiple sclerosis patients.

**Supplementary Table 2. Percentage of lesioned voxels for each white matter tract**

|                                    | DMS ( <i>n</i> =22) | nDMS ( <i>n</i> =21) | DMS vs. nDMS         |          |                |
|------------------------------------|---------------------|----------------------|----------------------|----------|----------------|
|                                    |                     |                      | Difference [CI]      | <i>P</i> | <i>P</i> corr. |
| Anterior thalamic radiation L      | 2.33 (2.89)         | 2.88 (3.37)          | -0.80 [-2.74; 1.14]  | 0.41     | 0.61           |
| Anterior thalamic radiation R      | 2.32 (3.07)         | 2.89 (2.55)          | -0.79 [-2.61; 1.04]  | 0.39     | 0.67           |
| Cingulum cingulate L               | 1.10 (1.65)         | 0.37 (0.64)          | 0.62 [-0.14; 0.38]   | 0.12     | 0.50           |
| Cingulum cingulate R               | 0.55 (0.89)         | 0.24 (0.40)          | 0.28 [-0.17; 0.74]   | 0.21     | 0.63           |
| Cingulum hippocampus L             | 0.16 (0.43)         | 0.44 (1.02)          | -0.39 [-0.84; 0.06]  | 0.09     | 0.54           |
| Cingulum hippocampus R             | 0.82 (1.57)         | 0.46 (0.79)          | 0.31 [-0.51; 1.12]   | 0.45     | 0.50           |
| Superior longitudinal fasciculus L | 1.16 (1.65)         | 1.48 (1.45)          | -0.53 [-1.51; 0.45]  | 0.28     | 0.55           |
| Superior longitudinal fasciculus R | 1.47 (1.56)         | 2.27 (2.86)          | -0.90 [-2.38; 0.59]  | 0.23     | 0.55           |
| Uncinate fasciculus L              | 1.71 (1.90)         | 1.13 (1.58)          | 0.45 [-0.67; 1.57]   | 0.42     | 0.56           |
| Uncinate fasciculus R              | 1.91 (2.32)         | 1.50 (1.09)          | 0.32 [-0.86; 1.50]   | 0.59     | 0.59           |
| Corticospinal tract L              | 1.52 (1.72)         | 1.95 (1.92)          | -0.39 [-1.45; 0.67]  | 0.46     | 0.50           |
| Corticospinal tract R              | 1.23 (1.36)         | 3.55 (4.74)          | -2.55 [-4.78; -0.33] | 0.03     | 0.31           |

Displayed data are mean (standard deviation).

CI = confidence interval; corr. = FDR-corrected *P*-value; DMS = depressed multiple sclerosis patients; L = left; nDMS = non-depressed multiple sclerosis patients; R = right.

**Supplementary Table 3. Group comparisons for structural MRI between DMS and nDMS patients with correction for disease duration and sex**

|                   | DMS ( <i>n</i> =22) | nDMS ( <i>n</i> =21) | Difference [CI]         | <i>P</i> | <i>P</i> corr. |
|-------------------|---------------------|----------------------|-------------------------|----------|----------------|
| NWMV, ml          | 667.68 (34.89)      | 706.98 (47.90)       | -54.86 [-79.98; -29.73] | <0.001   | <0.001         |
| NGMV, ml          | 745.76 (56.61)      | 715.45 (50.63)       | 0.67 [-23.79; 25.12]    | 0.956    | 0.956          |
| T2LL, ml          | 5.69 (5.92)         | 7.45 (5.43)          | -0.65 [-4.36; 3.07]     | 0.728    | 0.848          |
| Hippocampus L, ml | 4.74 (0.68)         | 4.66 (0.69)          | -0.08 [-0.52; 0.35]     | 0.705    | 0.848          |
| Hippocampus R, ml | 4.80 (0.76)         | 4.51 (0.73)          | 0.07 [-0.38; 0.52]      | 0.754    | 0.848          |
| Amygdala L, ml    | 1.55 (0.36)         | 1.59 (0.32)          | -0.11 [-0.33; 0.11]     | 0.320    | 0.848          |
| Amygdala R, ml    | 1.62 (0.41)         | 1.50 (0.29)          | 0.06 [-0.15; 0.27]      | 0.549    | 0.848          |
| Thalamus L, ml    | 9.61 (1.00)         | 9.39 (1.39)          | -0.28 [-0.96; 0.39]     | 0.399    | 0.848          |
| Thalamus R, ml    | 9.33 (1.05)         | 9.06 (1.20)          | -0.22 [-0.83; 0.40]     | 0.481    | 0.848          |

Displayed data are mean (standard deviation).

CI = confidence interval; corr. = FDR-corrected *P*-value; DMS = depressed multiple sclerosis patients; L = left; NGMV = normalized grey matter volume; nDMS = non-depressed multiple sclerosis patients; NWMV = normalized white matter volume; R = right; T2LL = T2-weighted lesion load.

**Supplementary Table 4. Group comparisons for diffusivity parameters of each white matter tract between DMS and nDMS patients with correction for disease duration and sex**

|                                               | DMS ( <i>n</i> =22) | nDMS ( <i>n</i> =21) | Difference [CI]         | <i>P</i> | <i>P</i> corr. |
|-----------------------------------------------|---------------------|----------------------|-------------------------|----------|----------------|
| <b>FA</b>                                     |                     |                      |                         |          |                |
| Anterior thalamic radiation L                 | 0.380 (0.021)       | 0.385 (0.018)        | -0.009 [-0.022; 0.005]  | 0.208    | 0.646          |
| Anterior thalamic radiation R                 | 0.368 (0.020)       | 0.375 (0.014)        | -0.011 [-0.023; 0.000]  | 0.052    | 0.383          |
| Cingulum cingulate L                          | 0.389 (0.024)       | 0.400 (0.022)        | -0.018 [-0.033; -0.003] | 0.018    | 0.218          |
| Cingulum cingulate R                          | 0.360 (0.025)       | 0.367 (0.023)        | -0.014 [-0.030; 0.002]  | 0.080    | 0.383          |
| Cingulum hippocampus L                        | 0.351 (0.023)       | 0.342 (0.035)        | 0.004 [-0.016; 0.024]   | 0.678    | 0.814          |
| Cingulum hippocampus R                        | 0.357 (0.029)       | 0.352 (0.033)        | 0.001 [-0.021; 0.022]   | 0.949    | 0.972          |
| Superior longitudinal fasciculus L            | 0.374 (0.018)       | 0.374 (0.020)        | -0.004 [-0.017; 0.008]  | 0.490    | 0.712          |
| Superior longitudinal fasciculus R            | 0.378 (0.016)       | 0.370 (0.023)        | 0.003 [-0.010; 0.016]   | 0.658    | 0.814          |
| Uncinate fasciculus L                         | 0.360 (0.016)       | 0.373 (0.017)        | -0.016 [-0.027; -0.004] | 0.008    | 0.201          |
| Uncinate fasciculus R                         | 0.371 (0.017)       | 0.379 (0.016)        | -0.011 [-0.022; 0.001]  | 0.068    | 0.383          |
| Corticospinal tract L                         | 0.494 (0.018)       | 0.496 (0.016)        | -0.001 [-0.013; 0.011]  | 0.838    | 0.934          |
| Corticospinal tract R                         | 0.479 (0.018)       | 0.479 (0.022)        | 0.001 [-0.013; 0.015]   | 0.856    | 0.934          |
| <b>MD mm<sup>2</sup>/s (*10<sup>-3</sup>)</b> |                     |                      |                         |          |                |
| Anterior thalamic radiation L                 | 0.869 (0.038)       | 0.856 (0.030)        | 0.013 [-0.010; 0.036]   | 0.269    | 0.646          |
| Anterior thalamic radiation R                 | 0.868 (0.038)       | 0.853 (0.031)        | 0.017 [-0.007; 0.041]   | 0.157    | 0.628          |
| Cingulum cingulate L                          | 0.824 (0.039)       | 0.814 (0.024)        | 0.007 [-0.015; 0.030]   | 0.504    | 0.712          |
| Cingulum cingulate R                          | 0.800 (0.032)       | 0.789 (0.025)        | 0.009 [-0.011; 0.029]   | 0.381    | 0.712          |
| Cingulum hippocampus L                        | 0.861 (0.041)       | 0.863 (0.039)        | 0.000 [-0.027; 0.026]   | 0.972    | 0.972          |
| Cingulum hippocampus R                        | 0.860 (0.043)       | 0.865 (0.040)        | -0.010 [-0.038; 0.019]  | 0.495    | 0.712          |
| Superior longitudinal fasciculus L            | 0.812 (0.034)       | 0.805 (0.026)        | 0.004 [-0.016; 0.025]   | 0.666    | 0.814          |
| Superior longitudinal fasciculus R            | 0.806 (0.034)       | 0.813 (0.029)        | -0.008 [-0.031; 0.014]  | 0.442    | 0.712          |
| Uncinate fasciculus L                         | 0.853 (0.035)       | 0.834 (0.028)        | 0.013 [-0.008; 0.035]   | 0.226    | 0.646          |

|                       |               |               |                        |       |       |
|-----------------------|---------------|---------------|------------------------|-------|-------|
| Uncinate fasciculus R | 0.855 (0.037) | 0.846 (0.025) | 0.008 [-0.014; 0.030]  | 0.492 | 0.712 |
| Corticospinal tract L | 0.819 (0.027) | 0.815 (0.022) | 0.009 [-0.007; 0.026]  | 0.268 | 0.646 |
| Corticospinal tract R | 0.825 (0.026) | 0.838 (0.036) | -0.010 [-0.032; 0.011] | 0.347 | 0.712 |

Displayed data are mean (standard deviation).

CI = confidence interval; corr. = FDR-corrected  $P$ -value; DMS = depressed multiple sclerosis patients; FA = fractional anisotropy; L = left; MD = mean diffusivity; nDMS = non-depressed multiple sclerosis patients; R = right.

**Supplementary Table 5. Group comparisons for functional connectivity of fronto-limbic structures between DMS and nDMS patients with correction for disease duration and sex**

|                            | DMS ( <i>n</i> =22) | nDMS ( <i>n</i> =21) | Difference [CI]         | <i>P</i> | <i>P</i> corr. |
|----------------------------|---------------------|----------------------|-------------------------|----------|----------------|
| Amygdala L – frontal FC    | -1.066 (0.435)      | -0.711 (0.678)       | -0.308 [-0.699; 0.083]  | 0.119    | 0.357          |
| Amygdala R – frontal FC    | -1.094 (0.398)      | -0.516 (0.655)       | -0.507 [-0.873; -0.141] | 0.008    | 0.047          |
| Hippocampus L – frontal FC | -0.608 (0.535)      | -0.535 (0.620)       | -0.114 [-0.512; 0.285]  | 0.567    | 0.698          |
| Hippocampus R – frontal FC | -0.681 (0.454)      | -0.498 (0.517)       | -0.210 [-0.549; 0.128]  | 0.217    | 0.433          |
| Thalamus L – frontal FC    | 0.047 (0.482)       | 0.098 (0.580)        | -0.098 [-0.452; 0.257]  | 0.581    | 0.698          |
| Thalamus R – frontal FC    | 0.073 (0.514)       | -0.047 (0.590)       | 0.072 [-0.307; 0.451]   | 0.702    | 0.702          |

Displayed data are mean (standard deviation).

CI = confidence interval; corr. = FDR-corrected *P*-value; DMS = depressed multiple sclerosis patients; FC = functional connectivity; L = left; nDMS = non-depressed multiple sclerosis patients; R = right.

**Supplementary Table 6. Demographics and cognitive functioning of DMS<sup>MDD</sup> and nDMS<sup>lowHADS</sup> patients**

|                                  | DMS <sup>MDD</sup> (n=14) | nDMS <sup>lowHADS</sup> (n=16) | P      |
|----------------------------------|---------------------------|--------------------------------|--------|
| Age                              | 44.17 (11.57)             | 49.50 (7.95)                   | 0.15   |
| Sex (female/male)                | 11/3                      | 13/3                           | 0.86   |
| Educational level*               | 6.00 (5.00 – 6.00)        | 6.00 (5.00 – 6.00)             | 0.89   |
| MS type (RRMS/SPMS/PPMS/missing) | 10/3/4/0                  | 13/2/0/1                       | 0.31   |
| Disease duration                 | 6.54 (6.69)               | 14.99 (8.68)                   | < 0.01 |
| EDSS groups (percentage)         |                           |                                | 0.23   |
| 0 – 1.5                          | 0 (0%)                    | 0 (0%)                         |        |
| 2 – 4                            | 11 (79%)                  | 10 (63%)                       |        |
| 4.5 – 6                          | 2 (14%)                   | 6 (37%)                        |        |
| ≥ 6.5                            | 1 (7%)                    | 0 (0%)                         |        |
| HADS-A*                          | 11.00 (7.75 – 11.25)      | 4.00 (2.25 – 6.75)             | <0.001 |
| HADS-D*                          | –                         | 2.00 (1.25 – 2.75)             | –      |
| BDI-II                           | 29.79 (7.94)              | –                              | –      |

Displayed data are mean (standard deviation).

\* Not normally distributed data for which median (interquartile range) are provided

BDI-II = Beck's Depression Inventory Second Edition; DMS<sup>MDD</sup> = depressed multiple sclerosis patients with a current major depressive disorder; EDSS = Expanded Disability Status Scale; HADS = Hospital Anxiety and Depression Scale; A = Anxiety; D = Depression; nDMS<sup>lowHADS</sup> = non-depressed multiple sclerosis patients with a low hospital anxiety and depression – depression subscale score; PPMS = primary progressive multiple sclerosis; RRMS = relapsing remitting multiple sclerosis; SPMS = secondary progressive multiple sclerosis.

**Supplementary Table 7. Cognitive functioning of DMS<sup>MDD</sup> and nDMS<sup>lowHADS</sup> patients**

|                                         | DMS <sup>MDD</sup> (n=14) | nDMS <sup>lowHADS</sup> (n=16) | Difference [CI]      | P    |
|-----------------------------------------|---------------------------|--------------------------------|----------------------|------|
| Verbal memory and learning              | -2.20 (1.08) <sup>a</sup> | -1.04 (2.02)                   | -1.68 [-3.00; -0.37] | 0.01 |
| Information processing speed            | -0.60 (0.70)              | -0.30 (0.83)                   | -0.57 [-1.19; 0.06]  | 0.07 |
| Visuospatial memory                     | 0.41 (0.87)               | -0.49 (2.73)                   | 0.18 [-1.46; 1.81]   | 0.83 |
| Short-term memory<br>Digit span forward | -0.52 (0.85)              | -0.58 (1.00)                   | 0.05 [-0.79; 0.88]   | 0.91 |
| Working memory<br>Digit span backward   | -0.82 (1.28)              | -0.77 (1.41)                   | -0.01 [-1.21; 1.19]  | 0.98 |
| Letter-number sequencing                | -1.21 (1.15)              | -0.64 (1.37)                   | -0.50 [-1.61; 0.61]  | 0.37 |
| Verbal fluency<br>animals               | 0.16 (0.82) <sup>a</sup>  | 0.19 (0.96)                    | -0.15 [-0.93; 0.84]  | 0.71 |
| professions                             | -0.31 (1.40) <sup>a</sup> | 0.26 (0.88)                    | -0.63 [-1.46; 0.20]  | 0.13 |
| m-words                                 | -0.38 (0.72) <sup>a</sup> | 0.04 (0.71)                    | -0.33 [-0.92; 0.26]  | 0.26 |

Displayed data are mean (standard deviation).

<sup>a</sup> n = 13

CI = confidence interval; DMS<sup>MDD</sup> = depressed multiple sclerosis patients with a current major depressive disorder; nDMS<sup>lowHADS</sup> = non-depressed multiple sclerosis patients with a low hospital anxiety and depression – depression subscale score.



**Supplementary Table 8. Structural MRI data from DMS<sup>MDD</sup> and nDMS<sup>lowHADS</sup> patients**

|                   | DMS <sup>MDD</sup> (n=14) | nDMS <sup>lowHADS</sup> (n=16) | Difference [CI]          | <i>P</i> | <i>P</i> corr. |
|-------------------|---------------------------|--------------------------------|--------------------------|----------|----------------|
| NWMV, ml          | 669.05 (31.20)            | 720.52 (45.14)                 | -75.84 [-104.00; -47.67] | < 0.001  | < 0.001        |
| NGMV, ml          | 749.33 (57.48)            | 731.43 (46.68)                 | -6.70 [-3.64; 23.00]     | 0.65     | 0.83           |
| T2LL, ml          | 4.05 (3.69)               | 5.39 (3.41)                    | -0.14 [-0.43; 0.15]      | 0.35     | 0.63           |
| Hippocampus L, ml | 4.82 (0.71)               | 4.76 (0.67)                    | -0.04 [-0.60; 0.52]      | 0.88     | 0.88           |
| Hippocampus R, ml | 4.87 (0.79)               | 4.62 (0.68)                    | 0.07 [-0.51; 0.66]       | 0.80     | 0.90           |
| Amygdala L, ml    | 1.59 (0.36)               | 1.66 (0.31)                    | -0.08 [-0.38; 0.21]      | 0.58     | 0.87           |
| Amygdala R, ml    | 1.73 (0.41)               | 1.54 (0.27)                    | 0.16 [-0.11; 0.43]       | 0.23     | 0.51           |
| Thalamus L, ml    | 9.66 (0.96)               | 9.84 (1.19)                    | -0.70 [-0.148; 0.08]     | 0.08     | 0.34           |
| Thalamus R, ml    | 9.43 (0.96)               | 9.52 (0.87)                    | -0.48 [-1.10; 0.14]      | 0.13     | 0.38           |

Displayed data are mean (standard deviation).

CI = confidence interval; corr. = FDR-corrected *P*-value; DMS<sup>MDD</sup> = depressed multiple sclerosis patients with a current major depressive disorder; L = left; NGMV = normalized grey matter volume; nDMS<sup>lowHADS</sup> = non-depressed multiple sclerosis patients with a low hospital anxiety and depression – depression subscale score; NWMV = normalized white matter volume; R = right; T2LL = T2-weighted lesion load.

**Supplementary Table 9. Diffusivity parameters for each white matter tract of DMS<sup>MDD</sup> and nDMS<sup>lowHADS</sup> patients**

|                                               | DMS <sup>MDD</sup> (n=14) | nDMS <sup>lowHADS</sup> (n=16) | Difference [CI]         | <i>P</i> | <i>P</i> corr. |
|-----------------------------------------------|---------------------------|--------------------------------|-------------------------|----------|----------------|
| <b>FA</b>                                     |                           |                                |                         |          |                |
| Anterior thalamic radiation L                 | 0.384 (0.014)             | 0.390 (0.016)                  | -0.007 [-0.021; 0.006]  | 0.28     | 0.62           |
| Anterior thalamic radiation R                 | 0.371 (0.015)             | 0.377 (0.013)                  | -0.011 [-0.023; 0.000]  | 0.06     | 0.72           |
| Cingulum cingulate L                          | 0.396 (0.021)             | 0.404 (0.023)                  | -0.014 [-0.032; 0.004]  | 0.13     | 0.60           |
| Cingulum cingulate R                          | 0.369 (0.020)             | 0.371 (0.024)                  | -0.007 [-0.026; 0.012]  | 0.48     | 0.72           |
| Cingulum hippocampus L                        | 0.359 (0.021)             | 0.349 (0.036)                  | 0.008 [-0.018; 0.035]   | 0.53     | 0.70           |
| Cingulum hippocampus R                        | 0.362 (0.029)             | 0.360 (0.032)                  | 0.007 [-0.020; 0.034]   | 0.59     | 0.74           |
| Superior longitudinal fasciculus L            | 0.378 (0.014)             | 0.377 (0.021)                  | -0.007 [-0.022; 0.009]  | 0.39     | 0.67           |
| Superior longitudinal fasciculus R            | 0.381 (0.014)             | 0.375 (0.020)                  | -0.001 [-0.016; 0.014]  | 0.91     | 0.95           |
| Uncinate fasciculus L                         | 0.362 (0.011)             | 0.375 (0.016)                  | -0.014 [-0.027; -0.002] | 0.03     | 0.64           |
| Uncinate fasciculus R                         | 0.373 (0.016)             | 0.381 (0.017)                  | -0.010 [-0.025; 0.005]  | 0.18     | 0.72           |
| Corticospinal tract L                         | 0.496 (0.020)             | 0.498 (0.017)                  | 0.003 [-0.013; 0.019]   | 0.67     | 0.81           |
| Corticospinal tract R                         | 0.479 (0.018)             | 0.481 (0.024)                  | -0.002 [-0.021; 0.017]  | 0.82     | 0.90           |
| <b>MD mm<sup>2</sup>/s (*10<sup>-3</sup>)</b> |                           |                                |                         |          |                |
| Anterior thalamic radiation L                 | 0.864 (0.025)             | 0.848 (0.028)                  | 0.013 [-0.010; 0.037]   | 0.26     | 0.70           |
| Anterior thalamic radiation R                 | 0.862 (0.024)             | 0.845 (0.021)                  | 0.019 [-0.001; 0.039]   | 0.06     | 0.49           |
| Cingulum cingulate L                          | 0.827 (0.038)             | 0.810 (0.024)                  | 0.012 [-0.015; 0.039]   | 0.36     | 0.67           |
| Cingulum cingulate R                          | 0.799 (0.032)             | 0.789 (0.027)                  | 0.008 [-0.017; 0.033]   | 0.53     | 0.74           |
| Cingulum hippocampus L                        | 0.864 (0.033)             | 0.865 (0.039)                  | 0.006 [-0.025; 0.037]   | 0.69     | 0.79           |
| Cingulum hippocampus R                        | 0.860 (0.039)             | 0.865 (0.041)                  | -0.016 [-0.050; 0.019]  | 0.35     | 0.70           |
| Superior longitudinal fasciculus L            | 0.816 (0.023)             | 0.803 (0.025)                  | 0.013 [-0.009; 0.034]   | 0.23     | 0.68           |
| Superior longitudinal fasciculus R            | 0.809 (0.029)             | 0.809 (0.025)                  | -0.001 [-0.025; 0.023]  | 0.91     | 0.91           |
| Uncinate fasciculus L                         | 0.858 (0.028)             | 0.831 (0.023)                  | 0.019 [-0.003; 0.041]   | 0.08     | 0.51           |
| Uncinate fasciculus R                         | 0.853 (0.022)             | 0.840 (0.023)                  | 0.011 [-0.009; 0.031]   | 0.28     | 0.68           |

|                       |               |               |                        |      |      |
|-----------------------|---------------|---------------|------------------------|------|------|
| Corticospinal tract L | 0.819 (0.020) | 0.809 (0.024) | 0.012 [-0.007; 0.031]  | 0.22 | 0.76 |
| Corticospinal tract R | 0.822 (0.020) | 0.830 (0.024) | -0.008 [-0.027; 0.012] | 0.43 | 0.69 |

Displayed data are mean (standard deviation).

CI = confidence interval; corr. = FDR-corrected  $P$ -value; DMS<sup>MDD</sup> = depressed multiple sclerosis patients with a current major depressive disorder; FA = fractional anisotropy; L = left; MD = mean diffusivity; nDMS<sup>lowHADS</sup> = non-depressed multiple sclerosis patients with a low hospital anxiety and depression – depression subscale score; R = right.

**Supplementary Table 10. Functional connectivity between fronto-limbic structures of DMS<sup>MDD</sup> and nDMS<sup>lowHADS</sup> patients**

|                            | DMS <sup>MDD</sup> ( <i>n</i> =14) | nDMS <sup>lowHADS</sup> ( <i>n</i> =16) | Difference [CI]         | <i>P</i> | <i>P</i> corr. |
|----------------------------|------------------------------------|-----------------------------------------|-------------------------|----------|----------------|
| Amygdala L – frontal FC    | -1.206 (0.453)                     | -0.695 (0.733)                          | -0.476 [-1.020; 0.068]  | 0.08     | 0.17           |
| Amygdala R – frontal FC    | -1.159 (0.426)                     | -0.514 (0.699)                          | -0.631 [-1.156; -0.106] | 0.02     | 0.06           |
| Hippocampus L – frontal FC | -0.505 (0.623)                     | -0.436 (0.646)                          | -0.145 [-0.711; 0.420]  | 0.60     | 0.72           |
| Hippocampus R – frontal FC | -0.855 (0.386)                     | -0.429 (0.521)                          | -0.534 [-0.938; -0.129] | 0.01     | 0.07           |
| Thalamus L – frontal FC    | 0.179 (0.482)                      | 0.185 (0.530)                           | 0.031 [-0.395; 0.456]   | 0.88     | 0.88           |
| Thalamus R – frontal FC    | 0.255 (0.482)                      | 0.031 (0.533)                           | 0.211 [-0.233; 0.655]   | 0.34     | 0.51           |

Displayed data are mean (standard deviation).

CI = confidence interval; corr. = FDR-corrected *P*-value; DMS<sup>MDD</sup> = depressed multiple sclerosis patients with a current major depressive disorder; FC = functional connectivity; L = left; nDMS<sup>lowHADS</sup> = non-depressed multiple sclerosis patients with a low hospital anxiety and depression – depression subscale score; R = right.
